# NMDA and PACAP Receptor Signaling Interact to Mediate Retinal-Induced SCN Cellular Rhythmicity in the Absence of Light

Ian C. Webb<sup>1</sup>, Lique M. Coolen<sup>1,2,3</sup>, Michael N. Lehman<sup>1,2\*</sup>

**1** Department of Neurobiology and Anatomical Sciences, University of Mississippi Medical Center, Jackson, Mississippi, United States of America, **2** Department of Physiology & Biophysics, University of Mississippi Medical Center, Jackson, Mississippi, United States of America, **3** Department of Anatomy and Cell Biology, University of Western Ontario, London, Ontario, Canada

## Abstract

The “core” region of the suprachiasmatic nucleus (SCN), a central clock responsible for coordinating circadian rhythms, shows a daily rhythm in phosphorylation of extracellular regulated kinase (pERK). This cellular rhythm persists under constant darkness and, despite the absence of light, is dependent upon inputs from the eye. The neural signals driving this rhythmicity remain unknown and here the roles of glutamate and PACAP are examined. First, rhythmic phosphorylation of the NR1 NMDA receptor subunit (pNR1, a marker for receptor activation) was shown to coincide with SCN core pERK, with a peak at circadian time (CT) 16. Enucleation and intraocular TTX administration attenuated the peak in the pERK and pNR1 rhythms, demonstrating that activation of the NMDA receptor and ERK in the SCN core at CT16 are dependent on retinal inputs. In contrast, ERK and NR1 phosphorylation in the SCN shell region were unaffected by these treatments. Intraventricular administration of the NMDA receptor antagonist MK-801 also attenuated the peak in SCN core pERK, indicating that ERK phosphorylation in this region requires NMDA receptor activation. As PACAP is implicated in photic entrainment and is known to modulate glutamate signaling, the effects of a PAC<sub>1</sub> receptor antagonist (PACAP<sub>6-38</sub>) on SCN core pERK and pNR1 also were examined. PACAP<sub>6-38</sub> administration attenuated SCN core pERK and pNR1, suggesting that PACAP induces pERK directly, and indirectly via a modulation of NMDA receptor signaling. Together, these data indicate that, in the absence of light, retinal-mediated NMDA and PAC<sub>1</sub> receptor activation interact to induce cellular rhythms in the SCN core. These results highlight a novel function for glutamate and PACAP release in the hamster SCN apart from their well-known roles in the induction of photic circadian clock resetting.

**Citation:** Webb IC, Coolen LM, Lehman MN (2013) NMDA and PACAP Receptor Signaling Interact to Mediate Retinal-Induced SCN Cellular Rhythmicity in the Absence of Light. *PLoS ONE* 8(10): e76365. doi:10.1371/journal.pone.0076365

**Editor:** Eric M. Mintz, Kent State University, United States of America

**Received:** July 22, 2013; **Accepted:** August 26, 2013; **Published:** October 1, 2013

**Copyright:** © 2013 Webb et al. This is an open-access article distributed under the terms of the Creative Commons Attribution License, which permits unrestricted use, distribution, and reproduction in any medium, provided the original author and source are credited.

**Funding:** This work was supported by a NSERC Discovery grant to MNL and a CIHR Fellowship to ICW. The funders had no role in study design, data collection and analysis, decision to publish, or preparation of the manuscript.

**Competing Interests:** The authors have declared that no competing interests exist.

\* E-mail: mlehman@umc.edu

## Introduction

The hypothalamic suprachiasmatic nucleus (SCN) is a central clock essential for circadian (i.e., ~24 hr) rhythms in a wide variety of behavioral and physiological endpoints, as well as for the ability of light to entrain rhythms to the twenty-four hour world [1,2,3]. At the tissue level, SCN neurons show regional heterogeneity with regard to both neuropeptide expression and cellular rhythmicity [4,5,6]. In rodents, phosphorylated extracellular-regulated kinase (pERK; also, known as MAP kinase) defines two subpopulations of endogenously rhythmic SCN cells whose peak expression is in anti-phase to each other. During the subjective day, there is increased pERK in the dorsomedial “shell” region, whereas during the subjective night, pERK is increased in the ventrolateral “core” portion of the nucleus [7,8,9]. While most cellular rhythms are intrinsic to the SCN [10,11,12], the endogenous rhythm in SCN core pERK is dependent upon the eye as it is selectively abolished by enucleation [9]. Hence, retinal input induces cellular rhythmicity in a sub-compartment of the master circadian clock, even in the absence of light.

The role of the eye in photic entrainment is well-established. Synchronization of circadian rhythms to the external light/dark cycle is largely mediated by intrinsically photoreceptive retinal ganglion cells (ipRGCs) that project to the SCN via the retinohypothalamic tract (RHT) [13,14,15,16]. Photic stimulation at night results in an induction of *period* gene expression in the SCN [17,18,19] and a resetting of the molecular clock mechanism that mediates circadian timing [20]. Both glutamate and pituitary adenylate cyclase activating peptide (PACAP) are co-stored in retinal terminals [21,22,23] and have been implicated in SCN photic signal transduction [24]. NMDA receptor agonists, for example, can induce photic-like phase shifts of circadian rhythms, while antagonists can block light induced clock resetting [25,26,27]. Similarly, PACAP, when administered in nanomolar concentrations, induces photic-like phase shifts [28,29,30], and can increase SCN pERK and *period1* expression [30,31]. PACAP also modulates the postsynaptic response to glutamate in the SCN and other brain regions [28,32,33] and thus can exert at least some of its effects via a glutamatergic mechanism.

Here, we sought to elucidate the RHT output signals necessary for the rhythm in SCN core ERK phosphorylation that occurs in

the absence of light. Retinal efferents innervate the core region [34,35] and directly contact core pERK cells [9], suggesting that pERK may be induced directly by RHT neurotransmitter release. Given the roles of glutamate and PACAP in photic entrainment, it was hypothesized that both NMDA and PAC<sub>1</sub> receptor activation, induced via inputs from the eye, interact to generate rhythmic SCN core ERK phosphorylation in the absence of light. This hypothesis was tested by examining the association between phosphorylation of the NR1 NMDA receptor subunit (pNR1) [36,37] and rhythmic pERK in the SCN core region. The effects of enucleation and intraocular tetrodotoxin administration on SCN core NMDA receptor and ERK activation rhythms also were examined. Furthermore, using pharmacological manipulations it was tested if activation of NMDA or PAC<sub>1</sub> receptors is required for retinal-mediated pERK and pNR1 in the SCN core region.

## Materials and Methods

### Animals

Adult male Syrian hamsters (Charles River, Montreal, QC, CAN) were used for all experiments. Animals were singly housed in running wheel cages and entrained to a 14:10 light/dark cycle (~350lux L/0 lux D) for at least one week prior to the onset of experiments. Food and water were available *ad libitum*. Wheel revolutions were continuously monitored via magnetic switches and recorded using VitalView software (Mini Mitter, Bend, OR, USA). All procedures were approved by the Animal Use Subcommittee at the University of Western Ontario and the University Committee on Use and Care of Animals at the University of Michigan.

### Enucleation surgery

Animals were left undisturbed (n = 32) or were bilaterally enucleated (n = 34) under isoflurane anesthesia. Following removal of the eye, the sockets were filled with Gelfoam to reduce bleeding and the eyelids were sutured shut. Ketoprofen (5 mg/kg, s.c.) was administered as an analgesic. Following surgery, all animals were housed under constant darkness (DD) for one week prior to tissue collection. Clocklab was used to predict activity onsets (designated circadian time [CT] 12, by convention) and to calculate the time at which brains were to be collected. Animals were transcardially perfused at CT0, 4, 8, 12, 16, and 20 (n = 5–6/time pt. per condition), brains were collected, and sections through the SCN stained for both pERK and pNR1 using the immunofluorescent technique as described below.

### Intraocular TTX Administration

Following one week in DD, 2  $\mu$ l of citrate buffer vehicle (20 mM, pH 4.8 with 15  $\mu$ g/ml methylene blue added to aid with injection visualization; n = 31) or tetrodotoxin (TTX, 2  $\mu$ g/ $\mu$ l in vehicle, Sigma-Aldrich, St. Louis, MO, USA; n = 31) were injected into the vitreous chamber of each eye at the level of the ora serrata. Injections were administered with a cuffed needle attached to a 10  $\mu$ l Hamilton syringe that allowed for a 1 mm projection of the needle into the eye. The syringe was held in place for 1 min after completion of volume ejection to allow for adequate diffusion. All procedures were carried out under dim red light and the animals were anesthetized with isoflurane throughout. Injections were either during the early subjective day (CT3) with perfusion as described below at CT4, 8, and 12, or during the early subjective night (CT15) with perfusion at CT16, 20, and 0 (n = 5–6/time pt. per condition). Sections through the SCN were stained for both pERK and pNR1 using the immunofluorescent technique as described below.

To ensure that TTX administered at this dose inhibits retinal output over the time course of our experiments, we assessed the pupillary light reflex (PLR) following intraocular administration. Animals were housed under DD for 2 days and at CT11 were administered either vehicle (n = 6) or TTX (n = 5) as described above. Beginning one hour after administration and continuing every 3 hours for a 9 hour period, animals were briefly anaesthetized with isoflurane, and a digital video camera fitted with a +2 diopter lens and an infrared filter was used to capture an image of the eye (in a separate pilot study we determined that isoflurane did not significantly influence the PLR). Hamsters were then subjected to a 30s light pulse (~470 nm peak, 75 nm half-peak width) and the eye was re-imaged. The photos were imported into ImageJ (NIH), a pupil diameter to eye diameter ratio was determined for each animal prior to and after the light pulse, and the percent change in pupil to eye ratio was calculated. Analysis revealed that intraocular TTX administration at the current dose significantly inhibited the PLR for at least 10 hours following injection (**Fig. 1**).

To further establish that TTX transiently attenuates pERK and does not induce permanent ocular damage, an additional group of animals were injected with TTX at CT15, perfused one day, two days, or one week later at CT16 (n = 3–5 per group), and sections were immunostained for pERK using the immunoperoxidase technique as outlined below.

### Tissue Collection

Hamsters were deeply anesthetized with sodium pentobarbital (~300 mg/kg, i.p.) and perfused transcardially with saline followed by 150 ml of cold 4% paraformaldehyde in 0.1 M phosphate buffer (PB). All perfusions were performed under dim red light (~1 lux). Brains were removed, postfixed for 1 hr, equilibrated in 20% sucrose in PB, and stored at 4°C. Coronal sections (35  $\mu$ m) were cut on a freezing stage microtome, collected into four parallel series, and stored in cryoprotectant solution [38] at -20°C until immunohistochemical processing.

### Immunofluorescent Staining and Analysis

Sections from the SCN of intact, enucleated, vehicle- and TTX-treated animals were immuno-labeled for pERK and pNR1 using fluorescent techniques. All incubations were carried out at room temperature with free-floating sections and the tissue was extensively washed with 0.1 M phosphate buffered saline (PBS)

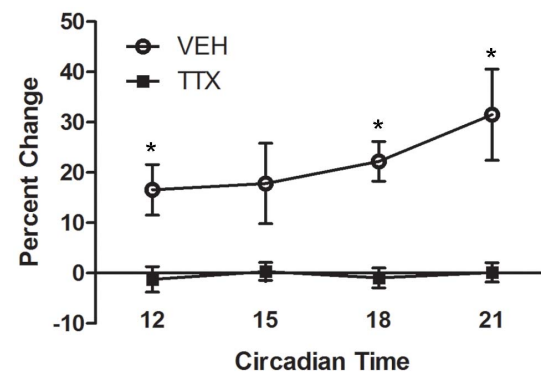

**Figure 1. Inhibition of pupillary light reflex by intraocular tetrodotoxin (TTX) over a 10 hour period.** Shown is the percent change in the pupil diameter to eye diameter ratio induced by a 30s blue light pulse following intraocular administration of vehicle (VEH) or TTX at circadian time 11. \* =  $p < 0.05$  vs. TTX. doi:10.1371/journal.pone.0076365.g001

between steps. Immunological reagents were diluted in incubation solution consisting of PBS with 0.4% Triton X-100 (Sigma-Aldrich) and 0.1% bovine serum albumin (Fisher Scientific, Ottawa, ON, Canada). To reduce non-specific staining, the tissue was first washed in 0.01% sodium azide (Fisher Scientific) in PBS (2×45 min), then exposed to 1% H<sub>2</sub>O<sub>2</sub> (Fisher Scientific) in PBS (10 min), and subsequently blocked in incubation solution for 1 hr. Next, the tissue was incubated with a rabbit polyclonal antibody specific for the phosphorylated forms of ERK 1 and 2 (1:1000, phospho-p44/p42 MAP Kinase, cat. # 9101L, Cell Signaling Technology, Inc., Danvers, MA, USA, 17hr) followed by biotinylated goat anti-rabbit IgG (1:400, Jackson ImmunoResearch Laboratories, Inc., West Grove, PA, USA, 1hr), HRP-conjugated avidin-biotin complex (1:1000 in PBS, Vector Laboratories, Burlingame, CA, USA, 1 hr), biotinylated tyramide (1:250 with 0.003% H<sub>2</sub>O<sub>2</sub> in PBS, PerkinElmer, Waltham, MA, USA, 10 min), and Alexa 488 conjugated streptavidin (1:200 in PBS, Molecular Probes, Carlsbad, CA, USA, 30 min). The sections were subsequently exposed to a rabbit anti-pNR1 IgG that detects single or dual phosphorylation at Ser896 and Ser897 (1:5000, overnight, cat. # 06-641, Upstate Biotech, Lake Placid, NY, USA) followed by CY3 conjugated donkey anti-rabbit IgG (1:400, Jackson ImmunoResearch, 30min). Sections were mounted onto plus-charged glass slides, dried, and coverslipped with an aqueous mounting medium (Gelvatol) containing an anti-fading agent [1,4-diazabicyclo(2,2)octane (DABCO); 50 mg/ml, Sigma-Aldrich, prepared as described previously [39]. These antibodies have been extensively characterized and yield appropriate bands on western blot analysis [36,37,40,41]. Omission of the primary antibodies resulted in a lack of staining.

Images of pERK and pNR1 immunofluorescent staining were captured for two sections comprising the middle and caudal SCN of each animal using NeuroLucida software (MicroBrightfield Bioscience, Williston, VT, USA) and a digital camera (Microfire A/R, Optronics, CA, USA) attached to a microscope (DM500B, Leica Microsystems, Wetzlar, Germany). Identification of the rostral/caudal level and the core/shell regions of each section was based on various landmarks including the shape of the optic chiasm and the supraoptic nucleus (SON), as determined previously [9]. Counting boxes were placed on the images to delineate the boundaries of the shell at the middle level and the core at the caudal level. Five 80 μm x 80 μm boxes at the middle level and two 160 μm W x 180 μm L boxes at the caudal level were used to quantify staining (**Fig. 2**). Single- and double-labeled cells located within these boxes were counted by an observer blind to experimental condition. Data are expressed as the mean number of cells per animal ± SEM.

As pERK immunostaining in the shell region is dense making it difficult to distinguish individual cells (see **Fig. 3C**), densitometry analysis also was used for quantification in this area. Images of one middle SCN section per animal were captured as outlined above. Image J (NIH) was used to apply a fixed pixel intensity threshold to the images. The percent area containing pixels above the fixed threshold was averaged over the five shell counting boxes for each animal.

Two-way or one-way ANOVAs followed by Bonferroni post-hoc comparisons were used to analyze treatment and time-of-day effects. When normality or equal variance tests failed, the non-parametric Kruskal-Wallis test followed by Dunn's multiple comparisons were used. The significance level was set at  $p = 0.05$  for all tests.

### Intraventricular Drug Administration

Under sodium pentobarbital anaesthesia (80 mg/kg, i.p.), animals were implanted with a guide cannula (7.0 mm, 22 g, Plastics One, Roanoke, VA, USA) aimed at the 3<sup>rd</sup> ventricle (stereotaxic coordinates: 1.0 mm anterior and 0.0 mm lateral to bregma, and 7.0 mm ventral to the skull surface). The guide cannulae were cemented to the skull with dental acrylic and screws, and dummy cannulae were inserted to prevent blockage. Ketoprofen (5 mg/kg, s.c.) was administered as an analgesic.

Following surgery, the animals were placed into DD for 7–8 days and at CT15 were subjected to one of two pharmacological treatments: 1) the non-competitive NMDA receptor channel blocker MK-801 (0.5 μl of 8.9 mM,  $n = 5$  or 0.5 μl of 17.8 mM,  $n = 5$ ; Sigma-Aldrich) or vehicle (0.5 μl sterile saline,  $n = 8$ ) or 2) the PAC<sub>1</sub> receptor antagonist PACAP<sub>6–38</sub> (2.5 μl of 0.1 mM,  $n = 5$ ; Bachem, Torrance, CA, USA) or vehicle (2.5 μl sterile saline,  $n = 5$ ). These pharmacological agents when administered near the current doses have previously been reported to attenuate photic-induced phase shifts in hamsters [26,42].

The injections were given via an injector cannula (projecting 1 mm beyond the tip of the guide cannula) attached to a syringe pump (Harvard Apparatus, Holliston, MA, USA) over a two minute period at flow rates of 0.25 μl/min (MK-801), or 1.25 μl/min (PACAP<sub>6–38</sub>). The injector cannula was left in place for an additional minute to allow for adequate diffusion. One hour following the injections (i.e., CT16), brains were collected as described above.

### Immunoperoxidase Staining and Analysis

SCN sections from animals treated with the various pharmacological agents were stained for pERK using an avidin-biotin-immunoperoxidase technique. All general procedures were as described above. The sections were incubated with polyclonal antibody specific for pERK 1/2 (1:1000, 17hr, Cell Signaling, cat. # 9101L), biotin-conjugated goat anti-rabbit IgG (1:500, Vector Laboratories, 1 hr), and HRP-conjugated avidin-biotin complex (1:1000 in PBS, Vector Laboratories, 1 hr). Staining was visualized via immersion in 0.02% diaminobenzidine (Sigma-Aldrich), 0.08% nickel sulfate, and 0.01% H<sub>2</sub>O<sub>2</sub> in PB for 10 min. The sections were mounted onto plus charged glass slides, dehydrated in a series of graded alcohols, cleared in CitriSolv (Fisher Scientific), and cover slipped with dibutyl phthalate xylene (DPX; Electron Microscopy Sciences, Hatfield, PA, USA).

The tissue was examined to verify correct cannula placement. In some animals, the ventricle was slightly enlarged, but this occurred evenly across all treatment groups and did not influence pERK expression.

Images of one-two caudal SCN sections per animal were captured with a digital camera (Magnafire, Optronics, CA, USA) attached to a microscope (DM500B, Leica Microsystems) and Image J was used to apply a fixed pixel intensity threshold to all images. An oval area of analysis (140 μm W x 240 μm H) was placed over the core pERK region and the percent of the area containing pixels above threshold was calculated for each animal. As a control, pERK immunostaining was also quantified in the SON. In this area, a circular area of analysis (220 μm diameter) was used. Data are expressed as the average per animal ± SEM and were analyzed using one-way ANOVA followed by Bonferroni comparisons, or independent t-tests as appropriate.

A separate series of SCN sections from MK-801, PACAP<sub>6–38</sub>, and vehicle treated animals were also labeled for pNR1 using a rabbit anti-pNR1 antibody (1:100,000, Upstate Biotech, cat. # 06-641) and the avidin-biotin-immunoperoxidase technique as described above. Numbers of pNR1 cells in the core region from

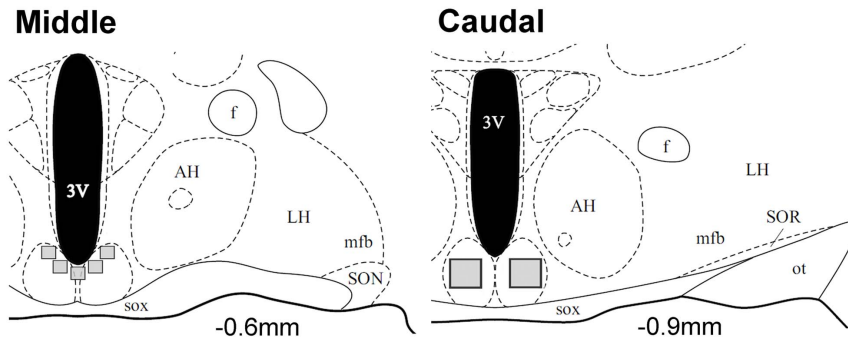

**Figure 2. Approximate counting box placement for quantification of pERK and pNR1.** The smaller boxes outline areas analyzed in the shell at the middle (-0.6 mm relative to bregma) level and the larger those in the core at the caudal (-0.9 mm) level. SOX: optic chiasm, 3V: 3<sup>rd</sup> ventricle, AH: anterior hypothalamus, LH: lateral hypothalamus, SON: supraoptic nucleus, f: fornix, mfb: medial forebrain bundle, ot: optic tract. Modified from Morin & Wood, 2001. doi:10.1371/journal.pone.0076365.g002

one caudal SCN section per animal were counted in a 180 μm H x 160 μm W counting box with the aid of a drawing tube attached to a microscope (DM500B, Leica Microsystems). Data are expressed as the average per animal ± SEM and were analyzed using one-way ANOVA followed by Bonferroni post-hoc comparisons, or independent t-tests as appropriate.

**Results**

**SCN core pERK and pNR1 cells colocalize and their rhythms coincide**

To examine the temporal associations between SCN core pERK and pNR1, and to determine the extent of colocalization of these markers, analysis of single and double-labeled pERK and pNR1 immunoreactive neurons was carried out in intact untreated animals across the circadian day. The number of SCN core pERK cells varied in a circadian fashion (H [5, N = 32] = 13.6, *p* = 0.018) with a peak at CT16 and nadirs at CT4 (*p* < 0.05 vs. CT16) and CT8 (*p* < 0.05 vs. CT16; **Figs. 3A-C & G-I, and 4A**), as observed previously [7,8,9]. Similarly, the number of pNR1 cells in the core region varied across the day (F [5,26] = 4.53, *p* = 0.004) with a peak at CT16 and nadirs at CT0 (*p* = 0.0035 vs. CT16) and CT4 (*p* = 0.0024 vs. CT16; **Figs. 3D-F & J-L, and 4B**). Analysis of double-labelled cells revealed that the vast majority of core pERK neurons observed at CT16 colocalized with pNR1 (93.5 ± 4.6% per animal, **Fig. 3M-O**), whereas fewer pNR1 cells (12.7 ± 2.7%) at this time point colocalized with pERK.

**Enucleation and intraocular TTX administration attenuate the peak in SCN core pERK and pNR1 rhythms**

Enucleated animals were examined to determine if pNR1, like pERK, is attenuated by removal of the eye. For pERK, there were overall effects of time (F[5,55] = 7.47, *p* < 0.0001), enucleation (F[1,55] = 11.95, *p* = 0.001), and a significant interaction (F[5,55] = 11.91, *p* < 0.0001), while significant main effects of time (F[5,54] = 7.42, *p* < 0.0001) and enucleation (F[1,54] = 8.04, *p* = 0.0064) were observed for pNR1. The peak in the number of SCN core pERK cells at CT16 was eliminated by enucleation (*p* < 0.0001; **Fig. 4A & C**), in agreement with previous results [9]. Similarly, removal of the eye significantly decreased the peak in pNR1 cells at CT16 (*p* = 0.0040, **Fig. 4B & D**), without influencing other time points. Following enucleation, both pERK (F[5,29] = 7.119, *p* = 0.0002) and pNR1 (F[5,28] = 4.84, *p* = 0.0026) remained rhythmic, and, in the absence of the CT16 peak, CT20 was now the time point with the highest number of core pERK (*p* = 0.0015 vs. CT0, *p* = 0.0038 vs. CT4, *p* = 0.0006 vs. CT12 and *p* = 0.0006 vs. CT16) and pNR1 neurons (*p* = 0.0050 vs. CT0 and *p* = 0.0024 vs. CT4).

To confirm that pERK and pNR1 rhythms in the SCN core are dependent on retinal neural output, hamsters were given intraocular injections of the voltage-gated sodium channel blocker

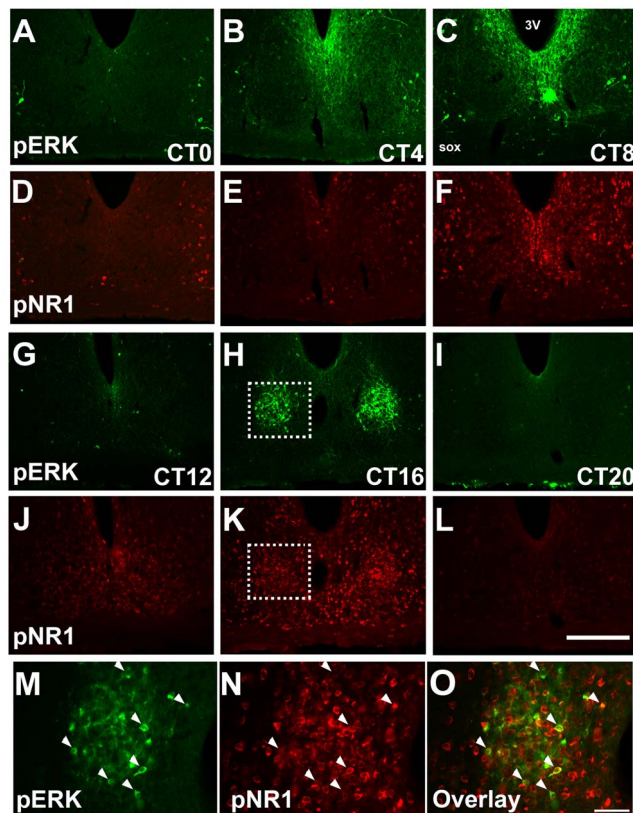

**Figure 3. Circadian variation in pERK and pNR1 immunoreactivity in the SCN.** A-L: Shown are representative images of pERK (green) and pNR1 (red) immunostaining in intact animals across the circadian day. The white boxes outline the area enlarged in panels M-O. Scale bar = 200 μm. M-O: Colocalization of pERK and pNR1 immunoreactive cells in the SCN core of an intact animal perfused at CT16. Arrows indicate some examples of double-labelled cells. Scale bar = 50 μm. doi:10.1371/journal.pone.0076365.g003

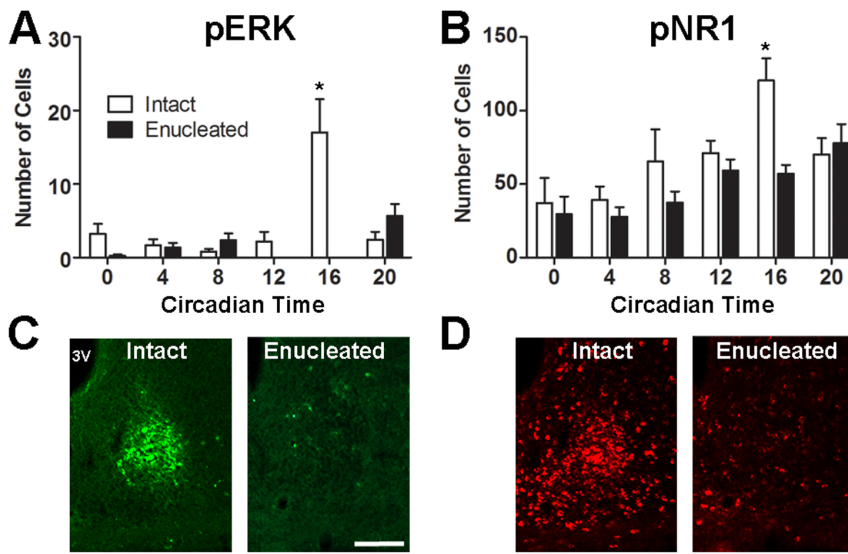

**Figure 4. The effect of enucleation on ERK and NR1 phosphorylation rhythms in the SCN core.** Shown are the numbers of pERK (A) and pNR1 (B) cells in the SCN core across the circadian day in intact and enucleated animals. Also shown are representative images of SCN core pERK (C) and pNR1 (D) immunostaining from intact and enucleated animals at CT16. Scale bar = 100  $\mu$ m. \* =  $p < 0.05$  vs. enucleated animals at CT16. doi:10.1371/journal.pone.0076365.g004

TTX or vehicle. Analyses revealed an overall main effect of time ( $F[5,49] = 5.60, p = 0.0004$ ) and a significant interaction ( $F[5,49] = 5.39, p = 0.0005$ ) for the number of pERK cells, and a main effect of time ( $F[5,50] = 11.12, p < 0.0001$ ) and a marginally significant interaction ( $F[5,50] = 2.23, p = 0.0654$ ) for pNR1. Similar to enucleation, intraocular TTX treatment significantly attenuated the peak in the number of pERK ( $p = 0.0073$ ; **Fig. 5A & C**) and pNR1 cells ( $p = 0.0092$ ; **Fig. 5B & D**) at CT16. In contrast to that observed for enucleation, TTX increased core pERK at CT20 ( $p = 0.0087$ ) compared to vehicle.

To further establish that TTX transiently attenuated pERK and did not induce permanent ocular damage, an additional group of

animals were injected with TTX and examined one day, two days, or one week later at CT16. Densitometry analysis revealed that pERK immunostaining was significantly decreased at days 1 ( $6.7 \pm 1.8\%$  area above threshold;  $p = 0.0081$ ) and 2 ( $13.9 \pm 7.9\%$ ;  $p = 0.0083$ ) following TTX administration relative to vehicle-treated controls ( $58.2 \pm 7.2\%$ ), but returned to baseline levels by day 7 ( $76.2 \pm 17.0\%$ ). These observations, in addition to the pupillometry results (**Fig. 1**), confirm that TTX transiently inhibited retinal output over the time course of our experiments.

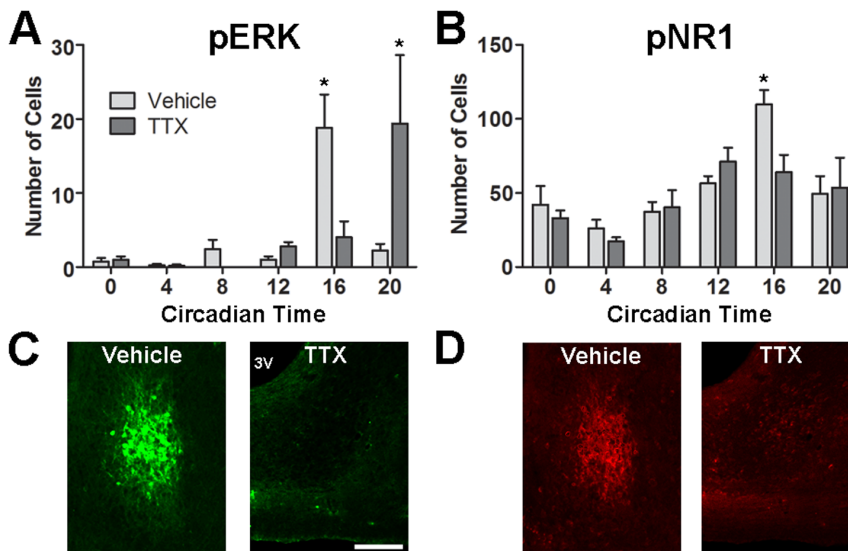

**Figure 5. Effects of intraocular TTX administration on ERK and NR1 phosphorylation rhythms in the SCN core.** Shown are the numbers of pERK (A) and pNR1 (B) cells in the SCN core across the circadian day in vehicle-treated and TTX-treated animals. Also shown are representative images of SCN core pERK (C) and pNR1 (D) immunostaining from vehicle-treated and TTX-treated animals at CT16. Scale bar = 100  $\mu$ m. \* =  $p < 0.05$  vs. the experimental treatment at that time point. doi:10.1371/journal.pone.0076365.g005

### Enucleation and intraocular TTX administration do not influence SCN shell ERK and NR1 phosphorylation rhythms

As enucleation does not affect SCN shell pERK [9], the association between pERK and pNR1 rhythms following removal of the eye and TTX administration also was examined in this region. Overall analysis revealed a significant main effect of time on SCN shell pERK (intact and enucleated:  $F[5,51] = 7.96$ ,  $p < 0.0001$ ; vehicle and TTX:  $F[5,48] = 6.09$ ,  $p = 0.0002$ ) and pNR1 (intact and enucleated:  $F[5,59] = 3.36$ ,  $p = 0.0097$ ; vehicle and TTX:  $F[5,51] = 6.52$ ,  $p < 0.0001$ ). However, there was no effect of enucleation or drug treatment, nor were there significant interactions (**Fig. 6**). As observed previously [8], pERK immunostaining peaked at CT8 in intact animals ( $p = 0.0089$  vs. CT20), and in the other treatment groups (enucleated:  $p = 0.0143$  vs. CT0,  $p = 0.0073$  vs. CT12,  $p = 0.0039$  vs. CT16 and  $p = 0.0040$  vs. CT20; vehicle-treated:  $p = 0.0084$  vs. CT0,  $p = 0.0085$  vs. CT16, and  $p = 0.0041$  vs. CT20; TTX-treated:  $p < 0.05$  vs. CT20). The number of pNR1 cells showed marginal rhythmicity with significant peaks observed at CT12 for enucleated (vs. CT0,  $p < 0.05$ ) and vehicle treated-animals ( $p = 0.0094$  vs. CT0,  $p = 0.0088$  vs. CT20) but no significant peaks detected in intact or TTX-treated animals. The majority of shell pERK cells observed over all time points also colocalized with pNR1 (82% of 164 total pERK cells observed).

### MK-801 attenuates ERK and NR1 phosphorylation in the SCN core

To determine if NMDA receptor activation is necessary for the peak in SCN core ERK phosphorylation, the NMDA receptor antagonist MK-801 was administered into the 3<sup>rd</sup> ventricle at CT15. Analysis of pERK immunostaining at CT16 revealed a significant effect of treatment ( $F[2,15] = 4.19$ ,  $p = 0.0358$ ) where the higher dose of MK-801 significantly decreased SCN core pERK compared to vehicle ( $p = 0.0151$ ), and the low dose had an

intermediate effect that failed to reach statistical significance ( $p = 0.1819$ , **Fig. 7A-D**). pERK immunostaining in the SON was unaffected by MK-801 administration (**Fig. 7E**), suggesting that MK-801 acted locally in the SCN to exert its effects.

To confirm that MK-801 blocked NMDA receptor activation in the SCN core, the numbers of pNR1 cells were examined in MK-801 treated animals. Both doses of MK-801 significantly reduced NR1 phosphorylation as compared to vehicle treatment ( $F[2,11] = 27.82$ ,  $p < 0.0001$ ; VEH vs. 8.9 mM:  $p < 0.001$ ; VEH vs. 17.8 mM:  $p = 0.0003$ ; **Fig. 7F**).

### PACAP<sub>6-38</sub> attenuates ERK and NR1 phosphorylation in the SCN core

As PACAP is colocalized with glutamate in retinal terminals [21] and modulates NMDA receptor signaling [43], the role of PAC<sub>1</sub> receptor activation in SCN core ERK phosphorylation was examined. pERK immunostaining in the SCN core was significantly attenuated by PACAP<sub>6-38</sub> administration compared to vehicle ( $p = 0.0207$ , **Fig. 8A-C**). pERK immunostaining in the SON was unaffected by PACAP<sub>6-38</sub> administration (41.7 ± 4.0 vs 43.6 ± 4.6).

To investigate whether PAC<sub>1</sub> receptor-mediated signaling influenced NMDA receptor phosphorylation, the effect of PACAP<sub>6-38</sub> administration on SCN core pNR1 immunostaining was examined. PACAP<sub>6-38</sub> significantly attenuated the number of pNR1 cells in the SCN core compared to vehicle ( $p = 0.0105$ ; **Fig. 8D-F**), indicating that PAC<sub>1</sub> receptor activation contributes to NR1 phosphorylation.

### Discussion

These results demonstrate that NMDA and PAC<sub>1</sub> receptor signaling interact to induce retinal-mediated SCN core ERK phosphorylation that occurs in the absence of light. Rhythmic phosphorylation of the NR1 subunit of the NMDA receptor in the SCN core occurs in pERK-immunoreactive cells, shows a similar

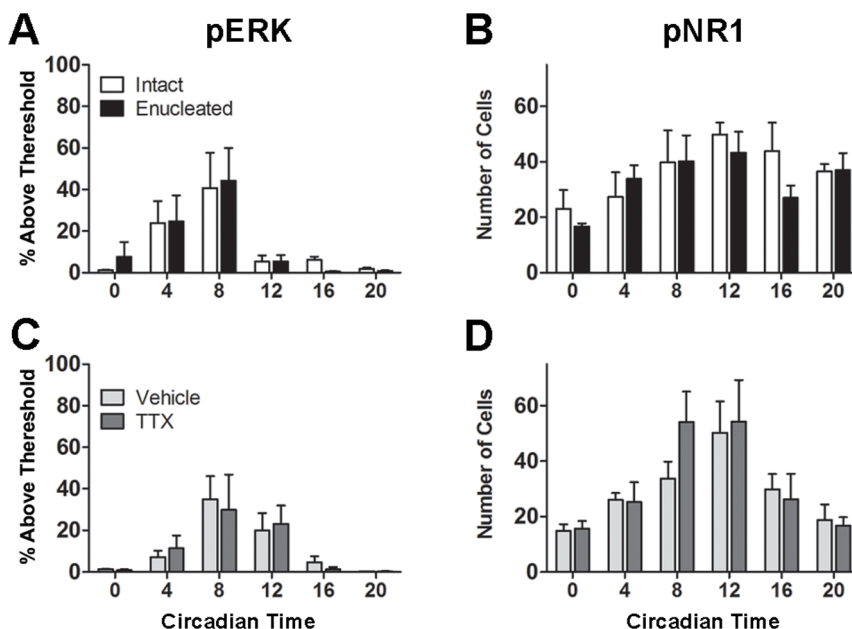

**Figure 6. Effects of enucleation and intraocular TTX administration on pERK and pNR1 in the SCN shell.** Shown are density (% area above threshold) of pERK (A & C) and the number of pNR1 cells (B & D) in the SCN shell across the circadian day in intact, enucleated, vehicle-treated, and TTX-treated animals.

doi:10.1371/journal.pone.0076365.g006

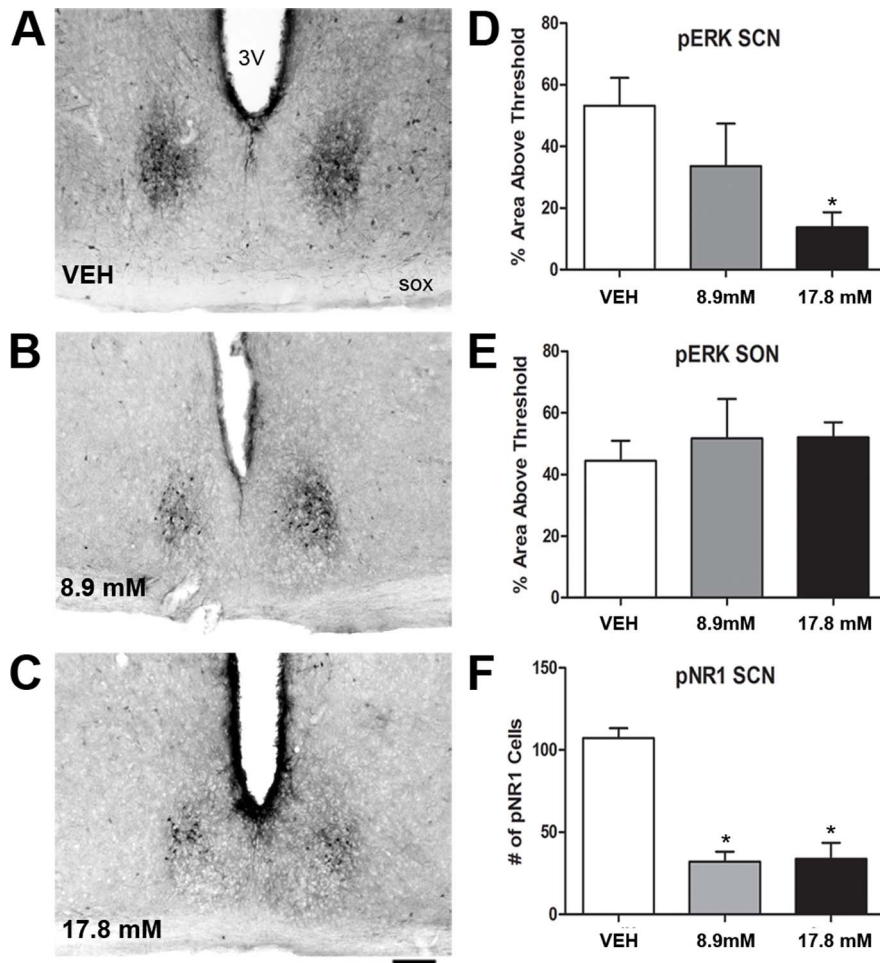

**Figure 7. Effects of intracerebroventricular MK-801 administration on pERK and pNR1 in the SCN core and SON.** A-C: Shown are representative images of pERK immunostaining in the SCN core from animals treated with vehicle (VEH), 8.9 mM MK-801, and 17.8 mM MK-801. Scale bar = 100  $\mu$ m. D-E: Densitometric quantification of the effects of MK-801 treatment on pERK immunostaining in the SCN and supraoptic nucleus (SON), respectively. F: Quantification of the effects of MK-801 treatment on the number of pNR1 cells in the SCN core. \* =  $p < 0.05$  vs. VEH. doi:10.1371/journal.pone.0076365.g007

temporal profile to pERK, and, like pERK its rhythmic peak is dependent upon inputs from the eye. Moreover, administration of MK-801 dose-dependently attenuates the peak in the SCN core pERK rhythm. Thus, NMDA receptor activation contributes to retinal-mediated SCN core ERK phosphorylation. As PACAP is colocalized with glutamate in the RHT [21] and modulates NMDA receptor signaling [43], we hypothesized that this neuropeptide also contributes to retinal-induced pERK. Indeed, administration of a PAC<sub>1</sub> receptor antagonist attenuated SCN core pERK and pNR1. Taken together, these results suggest that rhythmic ERK phosphorylation in the SCN core is induced by retinal-mediated NMDA and PAC<sub>1</sub> receptor activation, with PAC<sub>1</sub>-mediated signaling cascades acting directly, and indirectly via a modulation of NMDA receptor signaling (Fig. 9). As the rhythm in SCN core pERK persists under constant darkness, these findings indicate that activation of NMDA and PAC<sub>1</sub> receptors via retinal input during the night serves a function in the SCN distinct from their roles in photic clock resetting.

The current work also points to an endogenous rhythm in glutamate and PACAP release from retinal terminals that persists in the absence of light; a somewhat surprising conclusion given the extensive evidence implicating these neurotransmitters in photic entrainment [3,24]. However, earlier microdialysis work in

rodents has identified an endogenous rhythm in SCN glutamate levels, with a peak during the mid-dark period [44,45]. The current data suggests that this peak in SCN glutamate may be driven, in part, via release from retinal terminals. What is perhaps more intriguing, is that nocturnal activation of NMDA and PAC<sub>1</sub> receptors by retinal input does not result in circadian clock resetting. The reasons for this are unclear but may relate to differences in the magnitude of retinal input across these conditions or to a differential activation of SCN sub-regions. Photic stimulation results in relatively high levels of ERK phosphorylation over virtually the entire SCN [7,8,46,47] whereas retinal-mediated pERK in the absence of light is confined to a relatively small portion of the dorsomedial caudal SCN. This spatial segregation occurs despite retinal innervation of all rostral-caudal levels of the rodent SCN [48,49,50], suggesting that a particular subset of the ipRGCs that comprise the RHT drives rhythmic ERK phosphorylation in the SCN core. Selective endogenous activation of these ipRGCs in the absence of light simply may not be sufficient to induce clock resetting.

The ocular-mediated rhythm in SCN core NMDA and PAC<sub>1</sub> receptor activation implies the existence of a retinal circadian oscillator that regulates the output of ipRGCs that project to the caudal SCN core. Indeed, it is well-established that a self-

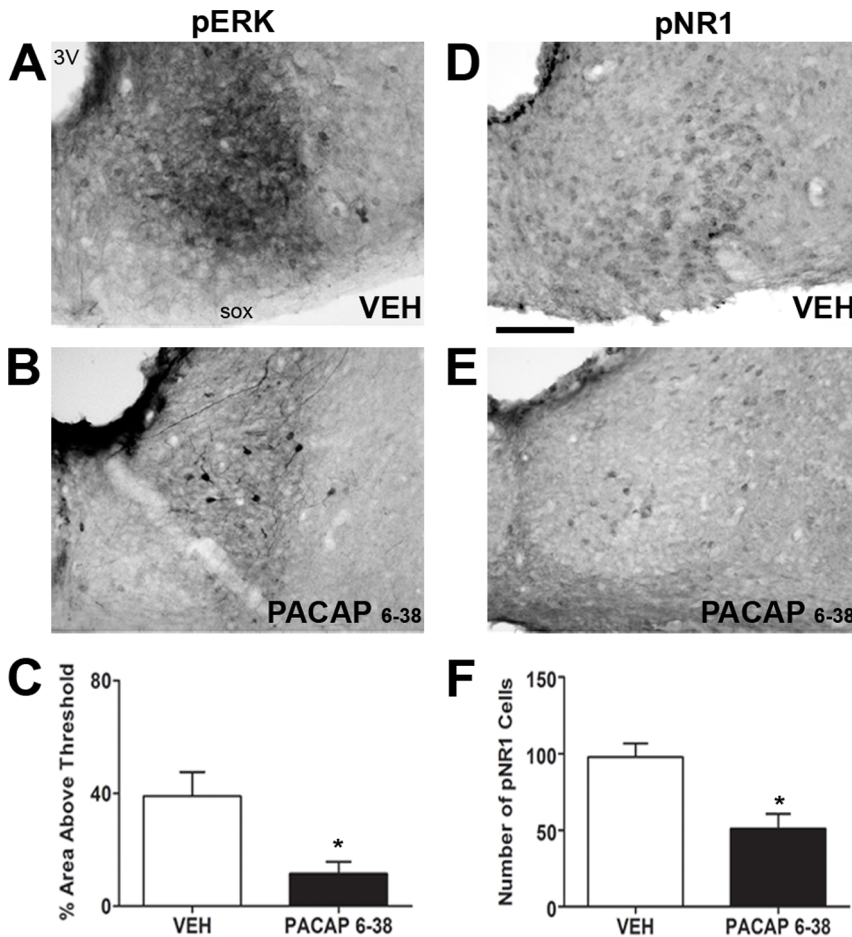

**Figure 8. Effects of intracerebroventricular PACAP<sub>6-38</sub> administration on pERK and pNR1 in the SCN core.** Shown are representative images of pERK (A-B) and NR1 (D-E) immunostaining in the SCN core from animals treated with vehicle (VEH) or PACAP<sub>6-38</sub>. Also, shown is quantification of pERK (C) and pNR1 (F) immunostaining for each condition. \* = p < 0.05 vs. VEH. Scale bar = 100 μm. doi:10.1371/journal.pone.0076365.g008

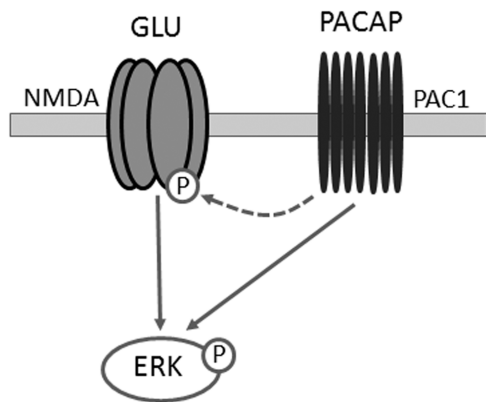

**Figure 9. Induction of retinal-mediated SCN core ERK phosphorylation via NMDA and PAC<sub>1</sub> receptor activation.** Glutamate (GLU) and PACAP released from the retinohypothalamic tract act via NMDA and PAC<sub>1</sub> receptors, respectively, to directly (solid lines) induce ERK phosphorylation (P). PACAP may also contribute to pERK indirectly (dashed line) via a potentiation of NMDA receptor signaling. doi:10.1371/journal.pone.0076365.g009

sustaining circadian oscillator is located in the eye [51,52,53,54,55], and circadian clock gene expression has been observed in most retinal cell types, including ganglion cells [56,57,58]. However, it remains unclear if ipRGCs are intrinsically rhythmic or if rhythms in these cells are induced by oscillators located elsewhere in the retina. On one hand, pharmacologically isolated ipRGCs show a weak circadian rhythm in sensitivity to bright light *in vitro* [59], suggesting that these cells act as autonomous circadian clocks. However, degeneration of rods or cones, or of cells in the inner retinal layer, attenuates the circadian rhythm in melanopsin expression that has been observed *in vivo* [60,61]. Hence, further work will be necessary to identify the locus of the retinal cellular oscillators necessary for the endogenous rhythm in input to the SCN.

In addition to decreasing the peak in SCN core pERK, administration of a PAC<sub>1</sub> receptor antagonist decreased pNR1 in this region. Glutamate binding to the NMDA receptor can induce signaling cascades that activate PKA and PKC, resulting in phosphorylation of NR1 at Ser896 and Ser897 [62]. Thus, phosphorylation of the NR1 subunit may be used to index NMDA activation [36,37], a conclusion supported further by our findings that SCN core pNR1 is attenuated by MK-801 administration. Taken together, these observations suggest that PAC<sub>1</sub> mediated signaling cascades act directly, and indirectly via a potentiation of NMDA receptor signaling, to induce SCN core pERK. Indeed, it



is well-established that PACAP can modulate SCN NMDA-mediated responses via both pre- and post-synaptic mechanisms [28,32,63,64,65]. However, as PAC<sub>1</sub> receptor activation also can stimulate PKA and PKC [66,67], and thus presumably directly phosphorylate the NR1 subunit, further work will be necessary to confirm a modulatory influence in this context, and to characterize the mechanisms of interaction.

We have previously reported that enucleation attenuates SCN core ERK phosphorylation in the rodent SCN [9] and confirm the results here. Consistent with the disruption of pERK and pNR1 rhythms by enucleation, intraocular TTX administration decreased peak ERK and NR1 phosphorylation in the SCN core. Thus, retinal neural signaling is necessary for the peak in pERK and pNR1 in the core region. The ability of TTX to block the nighttime peak of pERK and pNR1 also demonstrates that the enucleation effect is not due to secondary changes in the SCN following the loss of retinal afferents, nor is it via disruption of a humoral signal from the eye. However, unlike the effect of enucleation, intraocular TTX administration significantly increased pERK in the SCN core during the late subjective night. While the reasons for this discrepancy are unclear, there are several potential explanations. First, TTX may induce a phase delay of the retinal oscillator, thus shifting the peak to a later time. This seems unlikely as TTX administration does not induce a coincident increase in pNR1 at CT20. It is also possible that this discrepancy is due to a difference in the time course of ocular inhibition. That is, the TTX-induced increase in SCN core pERK at CT20 may be a transient compensatory response to the loss of retinal input that is absent in enucleated animals over the long term. Examining the short-term effects of enucleation may help to address this possibility. Finally, it may be argued that ERK phosphorylation during the late night is induced via extra-retinal inputs and that TTX somehow increases this activity. This is supported, in part, by the observation that a small number of core pERK cells remain at CT20 following enucleation.

Consistent with our previous findings [9], pERK in the SCN shell was unaffected by enucleation. The current results extend these findings to intraocular TTX injections and also show that NMDA receptor activation in this region is largely unaffected by removal of the eye or TTX. Although only marginal rhythmicity in pNR1 was seen in the SCN shell, pERK and pNR1 are extensively colocalized in this area. Thus, it appears that glutamate release from extra-retinal sources contributes to rhythmic ERK phosphorylation in the shell region. As circadian rhythms in SCN glutamate release have been observed *in vitro* [68], it is possible that the rhythmicity in shell ERK and NR1 phosphorylation is mediated by glutamate released from within the nucleus. Activation of ERK in the shell may represent a synchronizing signal among oscillator neurons as inhibition of pERK *in vitro* attenuates rhythms in SCN neuronal firing, and clock gene and vasopressin expression [69,70].

The functional role of retinal input to the SCN in the absence of light remains unclear. Certainly, it is not involved in conveying environmental timing information to the nucleus. However, it is possible that this input modulates the process of photic entrainment. Indeed, retinal-mediated pERK cells are extensively

colocalized with GRP (in hamsters: Webb and Lehman, unpublished observations; in rats: [71]), a neuropeptide widely implicated in the processing of photic information [72,73,74,75,76,77,78,79]. As light exposure has been reported to have enduring effects on the membrane properties of GRP neurons [80], it is conceivable that retinal input in the absence of light may have a similar long-term modulatory influence on this cell population and thus alter any subsequent photic response. Given the timing of the peak in core pERK and pNR1 relative to the photic phase response curve [81], it is tempting to postulate a link between the activation of GRP or other cell populations by the eye and the transition at CT16 from photic phase delays to advances. Further work will be necessary to examine these possibilities.

Enucleation has also been reported to result in a broader range of free-running periods [82], suggesting that precise circadian period determination may be a function of coupling between the retinal and SCN oscillators. Consistent with this notion, photoreceptor ablation or degeneration [83,84] and disruption of PACAP signaling [85] are associated with an altered free-running period. These findings point to an influence of retinal input on circadian period and the current results suggest that glutamate and PACAP acting upon GRP cells may be part of this mechanism. Indeed, GRP has recently been reported to promote SCN cellular coupling *in vitro* [86]. However, any effects of retinal input on SCN period are likely minimal, as the period of *period1* expression in cultured SCN explants, while slightly more variable, is essentially equal to the locomotor activity rhythm in the intact animal [87]. Hence, the observed effects of retinal manipulations on circadian period are likely mediated by extra-SCN sites involved in the expression of behavioral rhythms.

In sum, the current work suggests that rhythmic phosphorylation of ERK in the SCN core, as seen in constant darkness, is due to retinal-mediated activation of NMDA and PAC<sub>1</sub> receptors. These data point to a previously unsuspected role for the eye in modulating SCN function, and a role for NMDA and PAC<sub>1</sub> receptor activation in the SCN apart from the induction of photic clock resetting. Although further work is needed to delineate the precise role of this rhythmic retinal input, potential functions include regulating the phase responsiveness of the SCN to light at different times during subjective night, or synchronization among SCN neurons resulting in a more precise clock period. The current results also reinforce the view of the SCN as a heterogeneous structure comprised of multiple tissue-level oscillators [5] and suggest that its interactions with the eye, even in the absence of light, may be of key importance in determining its properties.

## Acknowledgments

We are grateful to Ricardo Baltazar for help with the experimental procedures.

## Author Contributions

Conceived and designed the experiments: ICW LMC MNL. Performed the experiments: ICW. Analyzed the data: ICW. Wrote the paper: ICW LMC MNL.

## References

1. Mohawk JA, Green CB, Takahashi JS (2012) Central and peripheral circadian clocks in mammals. *Annu Rev Neurosci* 35: 445–462.
2. Albrecht U (2012) Timing to perfection: the biology of central and peripheral circadian clocks. *Neuron* 74: 246–260.
3. Golombek DA, Rosenstein RE (2010) Physiology of circadian entrainment. *Physiol Rev* 90: 1063–1102.
4. Lee HS, Billings HJ, Lehman MN (2003) The suprachiasmatic nucleus: a clock of multiple components. *J Biol Rhythms* 18: 435–449.
5. Antle MC, Silver R (2005) Orchestrating time: arrangements of the brain circadian clock. *Trends Neurosci* 28: 145–151.
6. Morin LP (2012) Neuroanatomy of the extended circadian rhythm system. *Exp Neurol*.

7. Obrietan K, Impey S, Storm DR (1998) Light and circadian rhythmicity regulate MAP kinase activation in the suprachiasmatic nuclei. *Nat Neurosci* 1: 693–700.
8. Coogan AN, Piggins HD (2003) Circadian and photic regulation of phosphorylation of ERK1/2 and Elk-1 in the suprachiasmatic nuclei of the Syrian hamster. *J Neurosci* 23: 3085–3093.
9. Lee HS, Nelms JL, Nguyen M, Silver R, Lehman MN (2003) The eye is necessary for a circadian rhythm in the suprachiasmatic nucleus. *Nat Neurosci* 6: 111–112.
10. Gillette MU, Reppert SM (1987) The hypothalamic suprachiasmatic nuclei: circadian patterns of vasopressin secretion and neuronal activity in vitro. *Brain Res Bull* 19: 135–139.
11. Newman GC, Hospod FE (1986) Rhythm of suprachiasmatic nucleus 2-deoxyglucose uptake in vitro. *Brain Res* 381: 345–350.
12. Shibata S, Oomura Y, Kita H, Hattori K (1982) Circadian rhythmic changes of neuronal activity in the suprachiasmatic nucleus of the rat hypothalamic slice. *Brain Res* 247: 154–158.
13. Hattar S, Liao HW, Takao M, Berson DM, Yau KW (2002) Melanopsin-containing retinal ganglion cells: architecture, projections, and intrinsic photosensitivity. *Science* 295: 1065–1070.
14. Berson DM, Dunn FA, Takao M (2002) Phototransduction by retinal ganglion cells that set the circadian clock. *Science* 295: 1070–1073.
15. Gooley JJ, Lu J, Chou TC, Scammell TE, Saper CB (2001) Melanopsin in cells of origin of the retinohypothalamic tract. *Nat Neurosci* 4: 1165.
16. Schmidt TM, Chen SK, Hattar S (2011) Intrinsically photosensitive retinal ganglion cells: many subtypes, diverse functions. *Trends Neurosci* 34: 572–580.
17. Shigeyoshi Y, Taguchi K, Yamamoto S, Takekida S, Yan L, et al. (1997) Light-induced resetting of a mammalian circadian clock is associated with rapid induction of the mPer1 transcript. *Cell* 91: 1043–1053.
18. Albrecht U, Sun ZS, Eichele G, Lee CC (1997) A differential response of two putative mammalian circadian regulators, mper1 and mper2, to light. *Cell* 91: 1055–1064.
19. Shearman LP, Zylka MJ, Weaver DR, Kolakowski LF, Jr., Reppert SM (1997) Two period homologs: circadian expression and photic regulation in the suprachiasmatic nuclei. *Neuron* 19: 1261–1269.
20. Lowrey PL, Takahashi JS (2011) Genetics of circadian rhythms in Mammalian model organisms. *Adv Genet* 74: 175–230.
21. Hannibal J, Moller M, Ottersen OP, Fahrenkrug J (2000) PACAP and glutamate are co-stored in the retinohypothalamic tract. *J Comp Neurol* 418: 147–155.
22. Hannibal J, Ding JM, Chen D, Fahrenkrug J, Larsen PJ, et al. (1997) Pituitary adenylate cyclase-activating peptide (PACAP) in the retinohypothalamic tract: a potential daytime regulator of the biological clock. *J Neurosci* 17: 2637–2644.
23. Engelund A, Fahrenkrug J, Harrison A, Hannibal J (2010) Vesicular glutamate transporter 2 (VGLUT2) is co-stored with PACAP in projections from the rat melanopsin-containing retinal ganglion cells. *Cell Tissue Res* 340: 243–255.
24. Hannibal J (2002) Neurotransmitters of the retino-hypothalamic tract. *Cell Tissue Res* 309: 73–88.
25. Colwell CS, Menaker M (1992) NMDA as well as non-NMDA receptor antagonists can prevent the phase-shifting effects of light on the circadian system of the golden hamster. *J Biol Rhythms* 7: 125–136.
26. Rea MA, Buckley B, Lutton LM (1993) Local administration of EAA antagonists blocks light-induced phase shifts and c-fos expression in hamster SCN. *Am J Physiol* 265: R1191–1198.
27. de Vries MJ, Treep JA, de Pauw ES, Meijer JH (1994) The effects of electrical stimulation of the optic nerves and anterior optic chiasm on the circadian activity rhythm of the Syrian hamster: involvement of excitatory amino acids. *Brain Res* 642: 206–212.
28. Harrington ME, Hoque S, Hall A, Golombek D, Biello S (1999) Pituitary adenylate cyclase activating peptide phase shifts circadian rhythms in a manner similar to light. *J Neurosci* 19: 6637–6642.
29. Piggins HD, Marchant EG, Goguen D, Rusak B (2001) Phase-shifting effects of pituitary adenylate cyclase activating polypeptide on hamster wheel-running rhythms. *Neurosci Lett* 305: 25–28.
30. Minami Y, Furuno K, Akiyama M, Moriya T, Shibata S (2002) Pituitary adenylate cyclase-activating polypeptide produces a phase shift associated with induction of mPer expression in the mouse suprachiasmatic nucleus. *Neuroscience* 113: 37–45.
31. Butcher GQ, Lee B, Cheng HY, Obrietan K (2005) Light stimulates MSK1 activation in the suprachiasmatic nucleus via a PACAP-ERK/MAP kinase-dependent mechanism. *J Neurosci* 25: 5305–5313.
32. Chen D, Buchanan GF, Ding JM, Hannibal J, Gillette MU (1999) Pituitary adenylate cyclase-activating peptide: a pivotal modulator of glutamatergic regulation of the suprachiasmatic circadian clock. *Proc Natl Acad Sci U S A* 96: 13468–13473.
33. Macdonald DS, Weerapura M, Beazely MA, Martin L, Czerwinski W, et al. (2005) Modulation of NMDA receptors by pituitary adenylate cyclase activating peptide in CA1 neurons requires G alpha q, protein kinase C, and activation of Src. *J Neurosci* 25: 11374–11384.
34. Aioun J, Chambille I, Peytevin J, Martinet L (1998) Neurons containing gastrin-releasing peptide and vasoactive intestinal polypeptide are involved in the reception of the photic signal in the suprachiasmatic nucleus of the Syrian hamster: an immunocytochemical ultrastructural study. *Cell Tissue Res* 291: 239–253.
35. Bryant DN, LeSauter J, Silver R, Romero MT (2000) Retinal innervation of calbindin-D28K cells in the hamster suprachiasmatic nucleus: ultrastructural characterization. *J Biol Rhythms* 15: 103–111.
36. Dominguez JM, Balfour ME, Lee HS, Brown JL, Davis BA, et al. (2007) Mating activates NMDA receptors in the medial preoptic area of male rats. *Behav Neurosci* 121: 1023–1031.
37. Staudt MD, de Oliveira CV, Lehman MN, McKenna KE, Coolen LM (2011) Activation of NMDA receptors in lumbar spinothalamic cells is required for ejaculation. *J Sex Med* 8: 1015–1026.
38. Watson RE, Jr., Wiegand SJ, Clough RW, Hoffman GE (1986) Use of cryoprotectant to maintain long-term peptide immunoreactivity and tissue morphology. *Peptides* 7: 155–159.
39. Harlow E, Lane D (1988) *Antibodies: A laboratory manual*. Cold Spring Harbor: Cold Spring Harbor Laboratory Press. 726 p.
40. Roux PP, Blenis J (2004) ERK and p38 MAPK-activated protein kinases: a family of protein kinases with diverse biological functions. *Microbiol Mol Biol Rev* 68: 320–344.
41. Murphy LO, Blenis J (2006) MAPK signal specificity: the right place at the right time. *Trends Biochem Sci* 31: 268–275.
42. Bergstrom AL, Hannibal J, Hindersson P, Fahrenkrug J (2003) Light-induced phase shift in the Syrian hamster (*Mesocricetus auratus*) is attenuated by the PACAP receptor antagonist PACAP6-38 or PACAP immunoneutralization. *Eur J Neurosci* 18: 2552–2562.
43. Hannibal J (2006) Roles of PACAP-containing retinal ganglion cells in circadian timing. *Int Rev Cytol* 251: 1–39.
44. Glass JD, Hauser UE, Randolph W, Ferriera S, Rea MA (1993) Suprachiasmatic nucleus neurochemistry in the conscious brain: correlation with circadian activity rhythms. *J Biol Rhythms* 8 Suppl: S47–52.
45. Honma S, Katsuno Y, Shinohara K, Abe H, Honma K (1996) Circadian rhythm and response to light of extracellular glutamate and aspartate in rat suprachiasmatic nucleus. *Am J Physiol* 271: R579–585.
46. Butcher GQ, Doner J, Dziema H, Collamore M, Burgoon PW, et al. (2002) The p42/44 mitogen-activated protein kinase pathway couples photic input to circadian clock entrainment. *J Biol Chem* 277: 29519–29525.
47. Glickman G, Webb IC, Elliott JA, Baltazar RM, Reale ME, et al. (2012) Photic sensitivity for circadian response to light varies with photoperiod. *J Biol Rhythms* 27: 308–318.
48. Card JP, Moore RY (1984) The suprachiasmatic nucleus of the golden hamster: immunohistochemical analysis of cell and fiber distribution. *Neuroscience* 13: 415–431.
49. Abrahamson EE, Moore RY (2001) Suprachiasmatic nucleus in the mouse: retinal innervation, intrinsic organization and efferent projections. *Brain Res* 916: 172–191.
50. Morin LP, Shivers KY, Blanchard JH, Muscat L (2006) Complex organization of mouse and rat suprachiasmatic nucleus. *Neuroscience* 137: 1285–1297.
51. Tosini G, Menaker M (1996) Circadian rhythms in cultured mammalian retina. *Science* 272: 419–421.
52. Tosini G, Menaker M (1998) The clock in the mouse retina: melatonin synthesis and photoreceptor degeneration. *Brain Res* 789: 221–228.
53. Doyle SE, Grace MS, McIvor W, Menaker M (2002) Circadian rhythms of dopamine in mouse retina: the role of melatonin. *Vis Neurosci* 19: 593–601.
54. Storch KF, Paz C, Signorovitch J, Raviola E, Pawlyk B, et al. (2007) Intrinsic circadian clock of the mammalian retina: importance for retinal processing of visual information. *Cell* 130: 730–741.
55. Ruan GX, Allen GC, Yamazaki S, McMahon DG (2008) An autonomous circadian clock in the inner mouse retina regulated by dopamine and GABA. *PLoS Biol* 6: e249.
56. Ruan GX, Zhang DQ, Zhou T, Yamazaki S, McMahon DG (2006) Circadian organization of the mammalian retina. *Proc Natl Acad Sci U S A* 103: 9703–9708.
57. Tosini G, Kasamatsu M, Sakamoto K (2007) Clock gene expression in the rat retina: effects of lighting conditions and photoreceptor degeneration. *Brain Res* 1159: 134–140.
58. Liu X, Zhang Z, Ribelayga CP (2012) Heterogeneous expression of the core circadian clock proteins among neuronal cell types in mouse retina. *PLoS One* 7: e50602.
59. Weng S, Wong KY, Berson DM (2009) Circadian modulation of melanopsin-driven light response in rat ganglion-cell photoreceptors. *J Biol Rhythms* 24: 391–402.
60. Sakamoto K, Liu C, Kasamatsu M, Pozdeyev NV, Iuvone PM, et al. (2005) Dopamine regulates melanopsin mRNA expression in intrinsically photosensitive retinal ganglion cells. *Eur J Neurosci* 22: 3129–3136.
61. Sakamoto K, Liu C, Tosini G (2004) Classical photoreceptors regulate melanopsin mRNA levels in the rat retina. *J Neurosci* 24: 9693–9697.
62. Tingley WG, Ehlers MD, Kameyama K, Doherty C, Ptak JB, et al. (1997) Characterization of protein kinase A and protein kinase C phosphorylation of the N-methyl-D-aspartate receptor NR1 subunit using phosphorylation site-specific antibodies. *J Biol Chem* 272: 5157–5166.
63. Kopp MD, Meissl H, Dehghani F, Korf HW (2001) The pituitary adenylate cyclase-activating polypeptide modulates glutamatergic calcium signalling: investigations on rat suprachiasmatic nucleus neurons. *J Neurochem* 79: 161–171.

64. Dziema H, Obrietan K (2002) PACAP potentiates L-type calcium channel conductance in suprachiasmatic nucleus neurons by activating the MAPK pathway. *J Neurophysiol* 88: 1374–1386.
65. Michel S, Itri J, Han JH, Gniotczynski K, Colwell CS (2006) Regulation of glutamatergic signalling by PACAP in the mammalian suprachiasmatic nucleus. *BMC Neurosci* 7: 15.
66. Zhou CJ, Yada T, Kohno D, Kikuyama S, Suzuki R, et al. (2001) PACAP activates PKA, PKC and Ca(2+) signaling cascades in rat neuroepithelial cells. *Peptides* 22: 1111–1117.
67. Vaudry D, Falluel-Morel A, Bourgault S, Basille M, Burel D, et al. (2009) Pituitary adenylate cyclase-activating polypeptide and its receptors: 20 years after the discovery. *Pharmacol Rev* 61: 283–357.
68. Shinohara K, Honma S, Katsuno Y, Abe H, Honma K (1998) Circadian release of amino acids in the suprachiasmatic nucleus in vitro. *Neuroreport* 9: 137–140.
69. Akashi M, Hayasaka N, Yamazaki S, Node K (2008) Mitogen-activated protein kinase is a functional component of the autonomous circadian system in the suprachiasmatic nucleus. *J Neurosci* 28: 4619–4623.
70. Arima H, House SB, Gainer H, Aguilera G (2002) Neuronal activity is required for the circadian rhythm of vasopressin gene transcription in the suprachiasmatic nucleus in vitro. *Endocrinology* 143: 4165–4171.
71. Guillaumond F, Becquet D, Blanchard MP, Attia J, Moreno M, et al. (2007) Nocturnal expression of phosphorylated-ERK1/2 in gastrin-releasing peptide neurons of the rat suprachiasmatic nucleus. *J Neurochem* 101: 1224–1235.
72. Tanaka M, Hayashi S, Tamada Y, Ikeda T, Hisa Y, et al. (1997) Direct retinal projections to GRP neurons in the suprachiasmatic nucleus of the rat. *Neuroreport* 8: 2187–2191.
73. Earnest DJ, DiGiorgio S, Olschowka JA (1993) Light induces expression of fos-related proteins within gastrin-releasing peptide neurons in the rat suprachiasmatic nucleus. *Brain Res* 627: 205–209.
74. Romijn HJ, Sluiter AA, Pool CW, Wortel J, Buijs RM (1996) Differences in colocalization between Fos and PHI, GRP, VIP and VP in neurons of the rat suprachiasmatic nucleus after a light stimulus during the phase delay versus the phase advance period of the night. *J Comp Neurol* 372: 1–8.
75. Gamble KL, Allen GC, Zhou T, McMahon DG (2007) Gastrin-releasing peptide mediates light-like resetting of the suprachiasmatic nucleus circadian pacemaker through cAMP response element-binding protein and Per1 activation. *J Neurosci* 27: 12078–12087.
76. Piggins HD, Antle MC, Rusak B (1995) Neuropeptides phase shift the mammalian circadian pacemaker. *J Neurosci* 15: 5612–5622.
77. McArthur AJ, Coogan AN, Ajpru S, Sugden D, Biello SM, et al. (2000) Gastrin-releasing peptide phase-shifts suprachiasmatic nuclei neuronal rhythms in vitro. *J Neurosci* 20: 5496–5502.
78. Aida R, Moriya T, Araki M, Akiyama M, Wada K, et al. (2002) Gastrin-releasing peptide mediates photic entrainable signals to dorsal subsets of suprachiasmatic nucleus via induction of Period gene in mice. *Mol Pharmacol* 61: 26–34.
79. Gamble KL, Kudo T, Colwell CS, McMahon DG (2011) Gastrin-releasing peptide modulates fast delayed rectifier potassium current in Per1-expressing SCN neurons. *J Biol Rhythms* 26: 99–106.
80. Lesauter J, Silver R, Cloues R, Witkovsky P (2011) Light exposure induces short- and long-term changes in the excitability of retinorecipient neurons in suprachiasmatic nucleus. *J Neurophysiol* 106: 576–588.
81. Daan S, Pittendrigh CS (1976) A functional analysis of circadian pacemakers in nocturnal rodent II: The variability of phase response curves. *J Comp Physiol* 106: 253–266.
82. Yamazaki S, Alones V, Menaker M (2002) Interaction of the retina with suprachiasmatic pacemakers in the control of circadian behavior. *J Biol Rhythms* 17: 315–329.
83. Lupi D, Cooper HM, Froehlich A, Standford L, McCall MA, et al. (1999) Transgenic ablation of rod photoreceptors alters the circadian phenotype of mice. *Neuroscience* 89: 363–374.
84. Tosini G, Aguzzi J, Bullock NM, Liu C, Kasamatsu M (2007) Effect of photoreceptor degeneration on circadian photoreception and free-running period in the Royal College of Surgeons rat. *Brain Res* 1148: 76–82.
85. Hannibal J, Jansen F, Nielsen HS, Journot L, Brabet P, et al. (2001) Dissociation between light-induced phase shift of the circadian rhythm and clock gene expression in mice lacking the pituitary adenylate cyclase activating polypeptide type 1 receptor. *J Neurosci* 21: 4883–4890.
86. Maywood ES, Chesham JE, O'Brien JA, Hastings MH (2011) A diversity of paracrine signals sustains molecular circadian cycling in suprachiasmatic nucleus circuits. *Proc Natl Acad Sci U S A*.
87. Herzog ED, Aton SJ, Numano R, Sakaki Y, Tei H (2004) Temporal precision in the mammalian circadian system: a reliable clock from less reliable neurons. *J Biol Rhythms* 19: 35–46.
